# Supplementary material for: Accelerated microwave assisted synthesis of alumino-germanate imogolite nanotubes
Source: Royal Society of Chemistry journal article supplement (doi:10.1039/c6ra19275k), 2016-01-01
Supplement: c6ra19275k1.pdf [file c6ra19275k1.pdf]

## Accelerated Microwave Assisted Synthesis of Alumino-Germanate Imogolite Nanotubes

A. Avellan\*<sup>a,b</sup>, C. Levard<sup>a,b</sup>, C. Chaneac<sup>c</sup>, D. Borschneck<sup>a,b</sup>, Fabrice R.A. Onofri<sup>d</sup>, J. Rose<sup>a,b</sup>, A. Masion\*\*<sup>a,b</sup>

<sup>a</sup> CEREGE, CNRS, Aix-Marseille Université, IRD, UM34, 13545 Aix-en-Provence, France.

<sup>b</sup> iCeint – International Center for the Environmental Implications of NanoTechnologies, Europôle de l'Arbois, 13545 Aix-en-Provence, France.

<sup>c</sup> Chimie de la Matière Condensée de Paris - UMR7574 (UPMC/CNRS); Collège de France; 11, place Marcelin Berthelot; 75231 Paris; France

<sup>d</sup> IUSTI, CNRS, Aix-Marseille Université, UMR 7343, 13453, Marseille, France

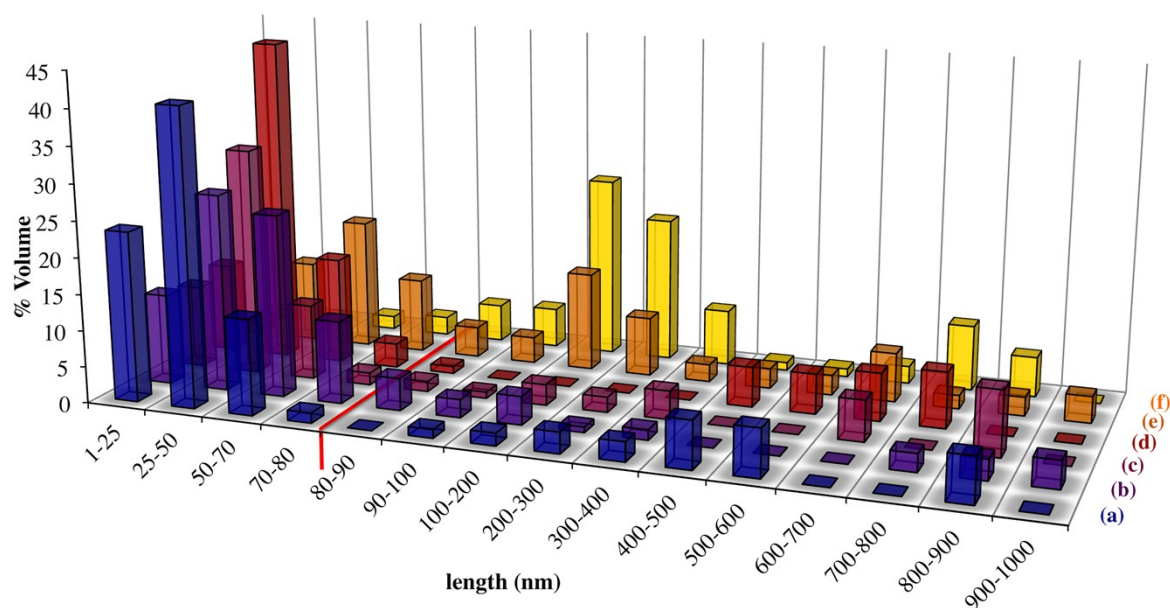

Figure S. 1: Repartition in volume percentage of Ge-imogolites nanotube lengths estimated from AFM images. At least 200 particles were considered excluding aggregates. Growth stages were performed under microwave heating at 100°C: (a) 1h, (b) 2h; 150°C: (c) 1h or (d) 2h; 200°C: (e) 1h or (f) 2h. The maximum length obtained with conventional heating is delimited with the red line.

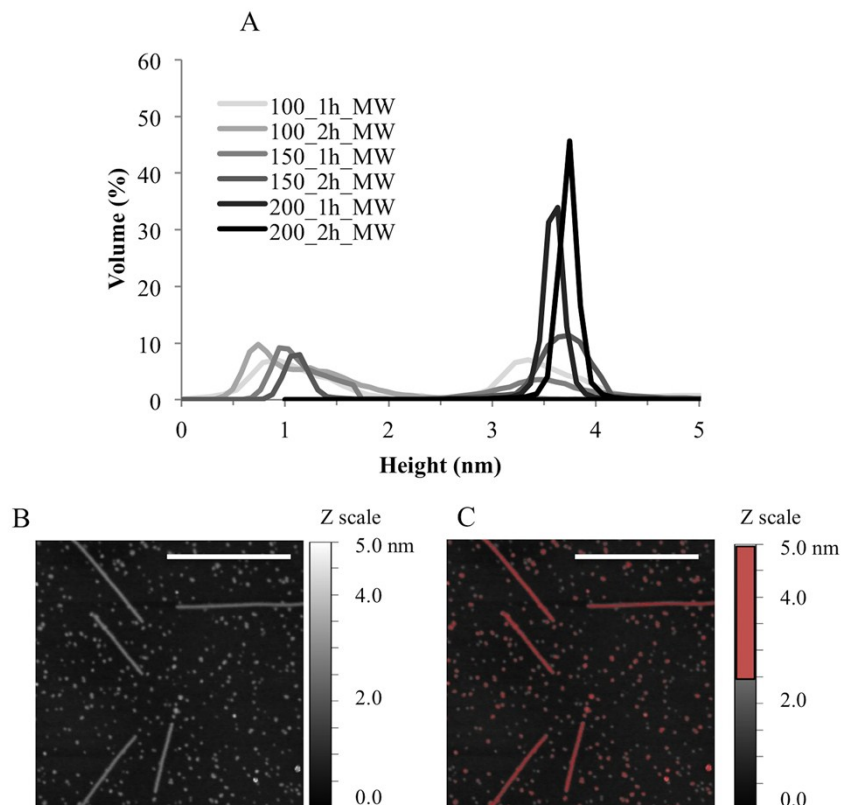

Figure S. 2 : Example of height thresholding to distinguish proto-imogolites from tubes. (A) Height repartition (volumes) of particles synthesized under MW irradiations obtained from AFM pictures. (B) AFM picture of Ge-imogolite grown under MW irradiation, 150°C, 2hrs. (C) Particles highest than 2.5nm (tubes) are highlighted in red.
